# Supplementary material
Source: publisher site journal article supplement (https://www.dovepress.com/get_supplementary_file.php?f=281645.docx)
Supplement: Supplementary file 1 [file get_supplementary_file.php]

Supplementary Table 1: Description of simplified pharmacogenomics phenotypes used in the analysis

|  | Simplified categories | Overall cohort  (N=10078) |
| --- | --- | --- |
| **CYP3A5 Phenotype**, N (%) |  |  |
| Intermediate metabolizer | Normal | 1318 (13.1%) |
| Intermediate to normal (extensive) metabolizer | Normal | 1 (0.0%) |
| Normal (extensive) metabolizer | Normal | 72 (0.7%) |
| Poor to intermediate metabolizer | Normal | 11 (0.1%) |
| Poor metabolizer | Slow | 8628 (86.0%) |
| **CYP2D6 Phenotype**, N (%) |  |  |
| Intermediate metabolizer | Normal | 3232 (32.2%) |
| Normal (extensive) metabolizer | Normal | 3082 (30.7%) |
| Intermediate to normal (extensive) metabolizer | Normal | 1970 (19.6%) |
| Intermediate to rapid metabolizer | Fast | 1 (0.0%) |
| Intermediate to ultrarapid metabolizer | Fast | 3 (0.0%) |
| Rapid metabolizer | Fast | 126 (1.3%) |
| Ultrarapid metabolizer | Fast | 79 (0.8%) |
| Poor metabolizer | Slow | 695 (6.9%) |
| Poor to intermediate metabolizer | Slow | 805 (8.0%) |
| Poor to normal (extensive) metabolizer | Slow | 37 (0.4%) |
| **HLA-B 5701 Phenotype**, N (%) |  |  |
| No increased risk of abacavir hypersensitivity reaction | Normal | 9406 (93.8%) |
| Significant risk of abacavir hypersensitivity reactions | Slow | 624 (6.2%) |
| **HLA-B 1502 HLA-A 3101 Phenotype**, N (%) |  |  |
| No increased risk for a hypersensitivity reaction to carbamazepine | Normal | 9436 (94.1%) |
| Significant risk for a hypersensitivity reaction to carbamazepine | Slow | 594 (5.9%) |
| **SLCO1B1 Phenotype**, N (%) |  |  |
| Normal function | Normal | 6283 (62.6%) |
| Decreased function (1/21) | Slow | 609 (6.1%) |
| Decreased function (1/5 or 1/15) | Slow | 2279 (22.7%) |
| Decreased to poor function (1/17, 5/21, or 15/21) | Slow | 426 (4.2%) |
| Poor function (17/17) | Slow | 6 (0.1%) |
| Poor function (17/21) | Slow | 16 (0.2%) |
| Poor function (21/21) | Slow | 22 (0.2%) |
| Poor function (5/17 or 15/17) | Slow | 69 (0.7%) |
| Poor function (5/5 or 15/15) | Slow | 181 (1.8%) |
| Possible increased risk of simvastatin myopathy | Fast | 102 (1.0%) |
| Increased risk of simvastatin myopathy | Fast | 37 (0.4%) |
| **CYP2C9 Phenotype**, N (%) |  |  |
| Intermediate metabolizer | Normal | 1277 (12.7%) |
| Intermediate to normal (extensive) metabolizer | Normal | 2084 (20.8%) |
| Normal (extensive) metabolizer | Normal | 6415 (64.0%) |
| Poor metabolizer | Slow | 41 (0.4%) |
| Poor to intermediate metabolizer | Slow | 187 (1.9%) |
| Poor to normal (extensive) metabolizer | Slow | 16 (0.2%) |
| Variable. Range: Intermediate metabolizer | Slow | 1 (0.0%) |
| Variable. Range: Intermediate to normal (extensive) metabolizer | Slow | 9 (0.1%) |
| **CYP2C19 Phenotype**, N (%) |  |  |
| Intermediate metabolizer | Normal | 1922 (19.2%) |
| Intermediate to normal (extensive) metabolizer | Normal | 676 (6.7%) |
| Intermediate to rapid metabolizer | Normal | 29 (0.3%) |
| Intermediate to ultrarapid metabolizer | Normal | 5 (0.0%) |
| Normal (extensive) metabolizer | Normal | 3950 (39.4%) |
| Poor metabolizer | Slow | 219 (2.2%) |
| Poor to intermediate metabolizer | Slow | 30 (0.3%) |
| Poor to normal (extensive) metabolizer | Slow | 8 (0.1%) |
| Rapid metabolizer | Fast | 2711 (27.0%) |
| Ultrarapid metabolizer | Fast | 480 (4.8%) |
| **DPYD CPIC categorization** , N (%) |  |  |
| 2 | Normal | 9410 (93.4%) |
| 1.5 | Intermediate | 554 (5.5%) |
| 1 | Intermediate | 111 (1.1%) |
| 0.5 | Poor | 1 (0.0%) |
| 0 | Poor | 1 (6.6%) |
| **HLA-B 5801 Phenotype**, N (%) |  |  |
| No increased risk of allopurinol hypersensitivity reaction | Absent | 9892 (98.6%) |
| Significant risk of allopurinol hypersensitivity syndrome | Present | 138 (1.4%) |
| **TPMT Phenotype**, N (%) |  |  |
| Intermediate metabolizer | Normal | 934 (9.3%) |
| Intermediate to normal metabolizer | Normal | 23 (0.2%) |
| Normal metabolizer | Normal | 9041 (90.1%) |
| Poor metabolizer | Slow | 29 (0.3%) |
| Poor to intermediate metabolizer | Slow | 3 (0.0%) |

Supplementary Table 2: Association of 10 selected pharmacogenomics phenotypes with the degree of disease burden and gender

|  | Disease burden | | Gender | | |
| --- | --- | --- | --- | --- | --- |
|  | Median  (25th – 75th %tiles) | P-values | Female,  N (%) | Male,  N (%) | P-values |
| CYP2C9, N (%)  Normal  Slow | 5 (3, 7)  5 (3, 7) | 0.44 | 5965 (97.7%)  141 (2.3%) | 3811 (97.1%)  113 (2.9%) | 0.09 |
| CYP2C19, N (%)  Normal  Fast  Slow | 5 (3, 7)  5 (3, 7)  5 (3, 7) | 0.41 | 3997 (65.5%)  1950 (31.9%)  159 (2.6%) | 2556 (65.1%)  1270 (32.4%)  98 (2.5%) | 0.87 |
| CYP2D6, N (%)  Normal  Fast  Slow | 5 (3, 7)  5 (3, 7)  5 (3, 7) | 0.72 | 5076 (83.1%)  126 (2.1%)  904 (14.8%) | 3208 (81.8%)  83 (2.1%)  633 (16.1%) | 0.19 |
| CYP3A5, N (%)  Normal  Slow | 5 (3, 7)  5 (3, 7) | 0.13 | 870 (14.2%)  5236 (85.8%) | 532 (13.6%)  3392 (86.4%) | 0.35 |
| DPYD, N (%)  Normal  Intermediate  Poor | 5 (3, 7)  5 (3, 7)  6 (5, 7) | 0.83 | 5744 (93.5%)  400 (6.5%)  0 (0.0%) | 3666 (93.2%)  265 (6.7%)  2 (0.1%) | 0.19 |
| HLA-B-1502, N (%)  Absent  Present | 5 (3, 7)  5 (3, 7) | 0.57 | 5743 (94.1%)  363 (5.9%) | 3693 (94.1%)  231 (5.9%) | 0.94 |
| HLA-B-5701, N (%)  Absent  Present | 5 (3, 7)  5 (2, 7) | 0.61 | 5714 (93.6%)  392 (6.4%) | 3692 (94.1%)  232 (5.9%) | 0.32 |
| HLA-B-5801, N (%)  Absent  Present | 5 (3, 7)  4 (2, 7) | 0.08 | 6019 (98.6%)  87 (1.4%) | 3873 (98.7%)  51 (1.3%) | 0.66 |
| SLCO1B1, N (%)  Normal  Fast  Slow | 5 (3, 7)  5 (2, 7)  5 (3, 7) | 0.27 | 3839 (62.9%)  77 (1.3%)  2190 (35.9%) | 2444 (62.3%)  62 (1.6%)  1418 (36.1%) | 0.38 |
| TPMT, N (%)  Normal  Slow | 5 (3, 7)  4 (3, 7) | 0.87 | 6081 (99.6%)  25 (0.4%) | 3917 (99.8%)  7 (0.2%) | 0.07 |

Supplemental Table 3 Top Primary Causes of Hospitalizations.


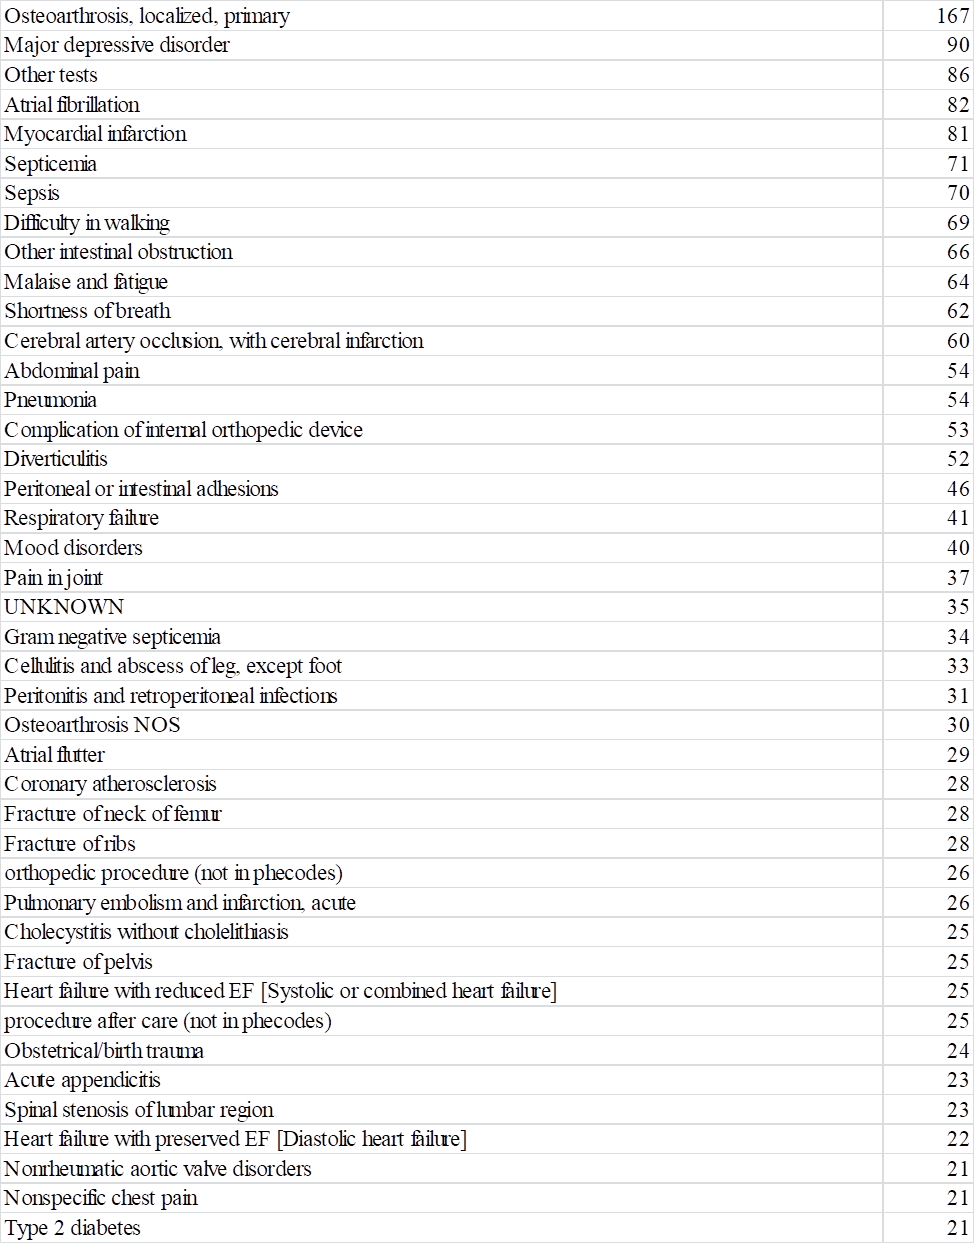


Legend: Only diagnoses with greater than 20 codes are listed.
